# Supplementary material
Source: MDPI journal article supplement (https://www.mdpi.com/2073-4344/9/3/220)
Supplement: s1 [file s1]

## Supporting Information

### Applicability of V<sub>2</sub>O<sub>5</sub>-WO<sub>3</sub>/TiO<sub>2</sub> Catalysts for the SCR Denitrification of Alumina Calcining Flue Gas

Ruliang Ning<sup>a,c,†</sup>, Li Chen<sup>a,c,†</sup>, Erwei Li<sup>a</sup>, Xiaolong Liu<sup>a,\*</sup>, Tingyu Zhu<sup>a,b,\*</sup>

<sup>a</sup> Beijing Engineering Research Center of Process Pollution Control, National Engineering Laboratory for Hydrometallurgical Cleaner Production Technology, Institute of Process Engineering, Chinese Academy of Sciences, Beijing 100190, China;

<sup>b</sup>Center for Excellence in Regional Atmospheric Environment, Institute of Urban Environment, Chinese Academy of Sciences, Xiamen 361021, China

<sup>c</sup>School of Chemistry and Chemical Engineering, Guizhou University, Guiyang, Guizhou 550025, China

(<sup>†</sup>) These authors contributed equally to this work.

(\*) Corresponding author. Tel./Fax: +86-10-82544821.

E-mail address: liuxl@ipe.ac.cn (Xiaolong Liu); tyzhu@ipe.ac.cn (Tingyu Zhu)

## **Contents**

1. Alumina calcining process flow chart and SCR catalyst position
2. Effect of oxygen content on the activity of 1V/Ti catalyst between 100–400 °C
3. Surface areas of various catalysts

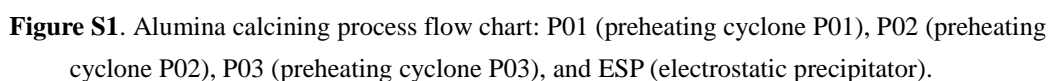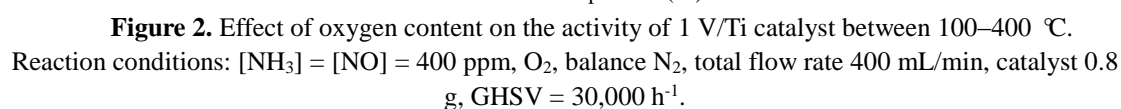

| Sample             | S <sub>BET</sub> (m <sup>2</sup> /g) |
|--------------------|--------------------------------------|
| Fresh (1 V-5 W/Ti) | 69.3                                 |
| 0.2Al doped        | 69.1                                 |
| 0.5Al doped        | 68.2                                 |
| 1Al doped          | 67.5                                 |
| 2Al doped          | 66.6                                 |
| 1Ca doped          | 66.4                                 |
| 1Na doped          | 65.1                                 |
| 1K doped           | 63.5                                 |
